# Supplementary material
Source: MDPI journal article supplement (https://www.mdpi.com/2078-1547/8/2/30)
Supplement: s1 [file s1]

## Appendix B

**Table A1** Input parameters of numerical examples

| <b>Structural characteristics</b> |       |
|-----------------------------------|-------|
| Pile diameter (m)                 | 1.8   |
| Length of cap (m)                 | 14    |
| Width of cap (m)                  | 7.7   |
| Height of cap (m)                 | 3     |
| <b>Wave characteristics</b>       |       |
| Wave height (m)                   | 2-4.5 |
| Wave period (s)                   | 6-14  |
| Water depth (m)                   | 30    |
| Submerged coefficient             | 0-2   |

**Table A2** Input parameters of five numerical cases

| Case No | Wave height(m) | Wave period(T) | KC number |
|---------|----------------|----------------|-----------|
| 1       | 2              | 6              | 3.46      |
| 2       | 3              | 8              | 5.46      |
| 3       | 3.5            | 10             | 7.13      |
| 4       | 4              | 12             | 9.35      |
| 5       | 4.5            | 14             | 12.16     |

## List of Figures

**Figure. A1.** Offshore bridge with Pile-Cap system

**Figure. A2.** Sketch of wave and pile-cap system interaction

**Figure. A3.** Variations of wave induced maximum horizontal forces ( $F_H^* = F_{H\max}/D\rho gH$ ) on pile for different mesh numbers

**Figure. A4.** Variations of pile group effect  $K_G$  versus different  $KC$  numbers for side by side arrangement with  $S_G/D=1$

**Figure. A5.** Variations of pile group effect  $K_G$  versus different  $KC$  numbers for tandem arrangement with  $S_G/D=1$

**Figure. A6.** Variations of flow velocity around the pile without cap

**Figure. A7.** Variations of flow velocity around the connection part between the cap and pile

**Figure. A8.** Variations of pile group effect versus varies  $KC$  numbers with side by side arrangement of pile group

**Figure. A9.** Variations of pile group effect versus varies  $KC$  numbers with tandem arrangement of pile group

**Figure. A10.** Variations of pile group effect versus varies submerged coefficients of cap with different arrangements of pile group

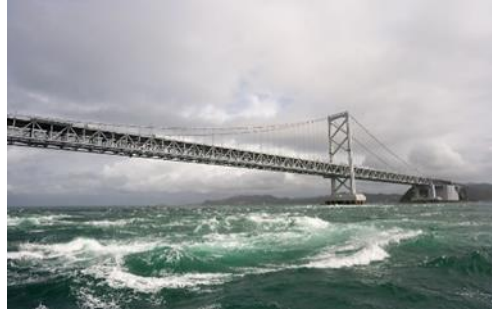

**Figure1.** Offshore bridge with Pile-Cap system

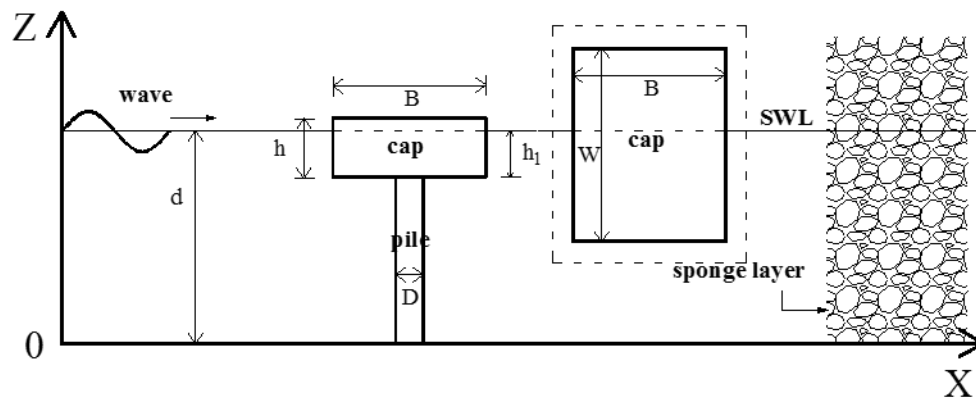

**Figure 2.** Sketch of wave and pile-cap system interaction

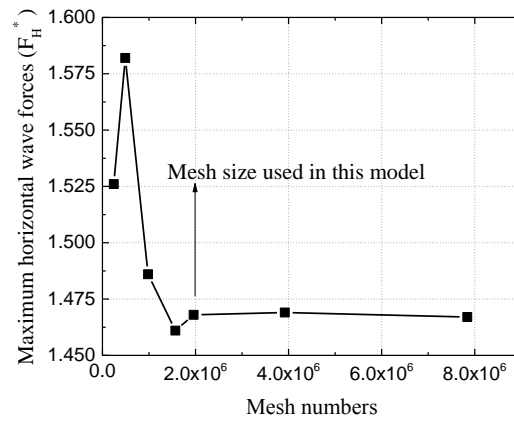

**Figure 3.** Variations of wave induced maximum horizontal forces ( $F_H^* = F_{Hmax}/D\rho gH$ ) on pile for different mesh numbers

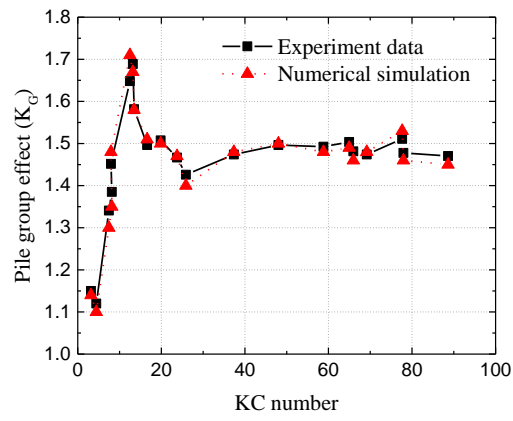

**Figure 4.** Variations of pile group effect  $K_G$  versus different  $KC$  numbers for side by side arrangement with  $S_G/D=1$

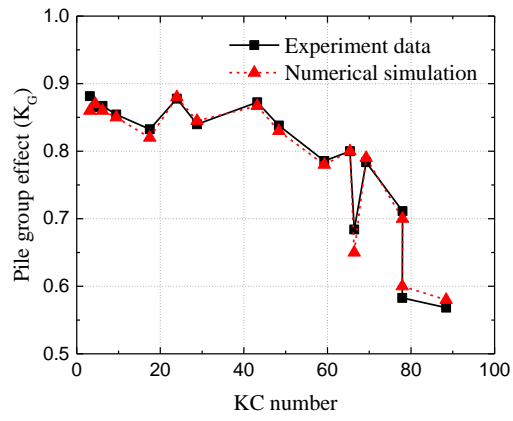

**Figure 5.** Variations of pile group effect  $K_G$  versus different  $KC$  numbers for tandem arrangement with  $S_G/D=1$



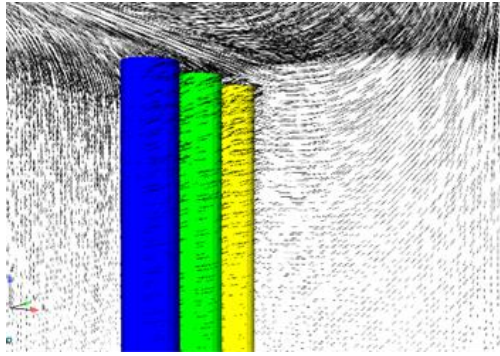

**Figure 6.** Variations of flow velocity around the pile without cap

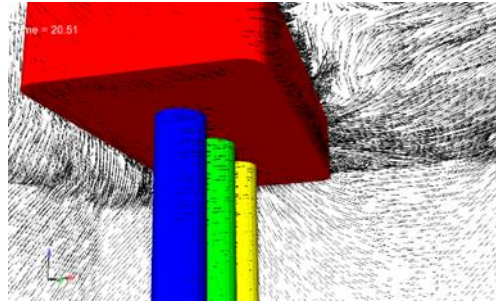

**Figure 7.** Variations of flow velocity around the connection part between the cap and pile

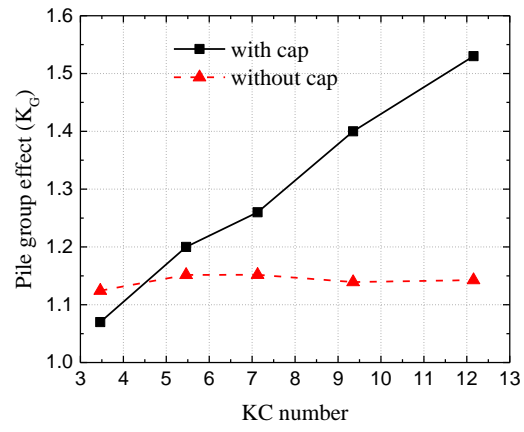

**Figure 8.** Variations of pile group effect versus varies  $KC$  numbers with side by side arrangement of pile group

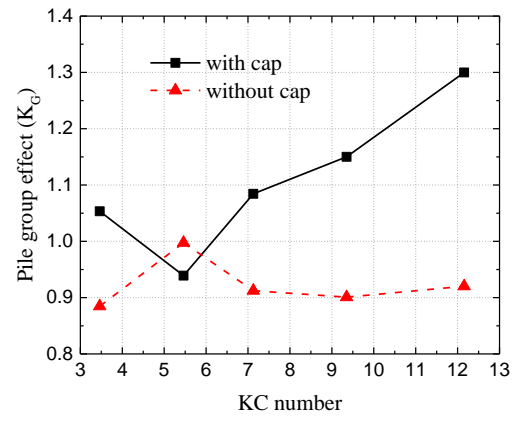

**Figure 9.** Variations of pile group effect versus varies  $KC$  numbers with tandem arrangement of pile group

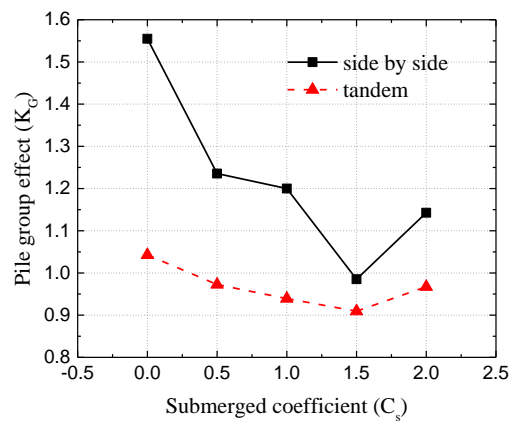

**Figure 10.** Variations of pile group effect versus varies submerged coefficients of cap with different arrangements of pile group
